# Supplementary material for: Influences on surgical antimicrobial prophylaxis decision making by surgical craft groups, anaesthetists, pharmacists and nurses in public and private hospitals
Source: PLOS journal article supplement (doi:10.1371/journal.pone.0225011), 2019-11-14
Supplement: S2 (10.1371/journal.pone.0225011.s002) [file journal.pone.0225011.s002]

1 S2 Appendix. Themes and subthemes mapped to the COM-B Model  
 2 and Theoretical Domains Framework

3

4 **Table C Themes and subthemes mapped to the COM-B Model and Theoretical Domains Framework**

| <b>Themes</b>                                                           | <b>Sub Themes</b>                                                                               | <b>COM-B Model Components</b> | <b>Relevant Domains (Theoretical Domains Framework)</b> |
|-------------------------------------------------------------------------|-------------------------------------------------------------------------------------------------|-------------------------------|---------------------------------------------------------|
| Low priority for surgical antimicrobial prophylaxis prescribing skills. | Surgical technique of greater importance                                                        | Physical Capability           | Skills                                                  |
|                                                                         | Deskilling surgeons                                                                             |                               |                                                         |
| Prescriber autonomy overrules guideline compliance                      | Guideline knowledge and awareness of limitations                                                | Psychological Capability      | Knowledge                                               |
|                                                                         | Competition as a means to regulate behaviour                                                    |                               | Memory, attention and decision processes                |
| Social codes of prescribing reinforce established practices             | Hierarchy Rules                                                                                 | Social Opportunity            | Social Influences                                       |
|                                                                         | Cross-specialty prescriber etiquette                                                            |                               |                                                         |
| Need for improved communication, documentation and data for action      | Poor documentation and communication                                                            | Physical Opportunity          | Environmental context and resources                     |
|                                                                         | 'Time-Out' supports pre-operative communication; post-operative management is less standardised |                               |                                                         |
|                                                                         | Data for action                                                                                 |                               |                                                         |
| Fears and perceptions of risk hinder appropriate SAP prescribing.       | Fear of infections                                                                              | Automatic Motivation          | Emotion                                                 |
|                                                                         | Varied risk perceptions across specialties                                                      |                               |                                                         |
|                                                                         | Fear of litigation                                                                              |                               |                                                         |
|                                                                         | Risking career progression and job security                                                     |                               |                                                         |
| Unclear roles, responsibilities and accountability                      | The buck stops with the surgeon                                                                 | Reflective Motivation         | Social/ professional role and identity                  |
|                                                                         | Passive prescribing hinders accountability and SAP cessation                                    |                               | Beliefs about Capabilities                              |
|                                                                         | Capacity for role expansion of pharmacists and nurses                                           |                               | Beliefs about Consequences                              |

5

6
